# Supplementary material
Source: PubMed Central journal article supplement (PMC3954848)

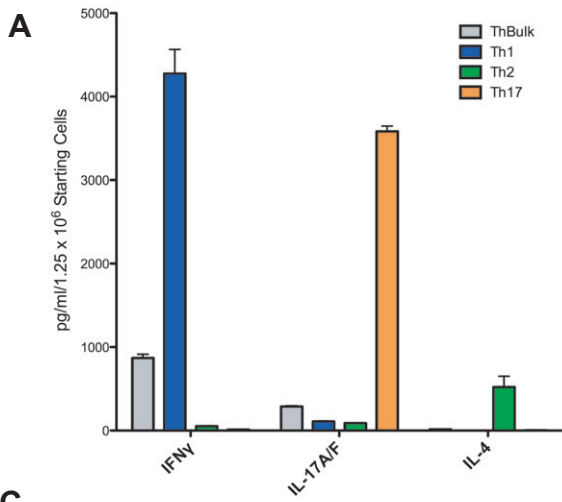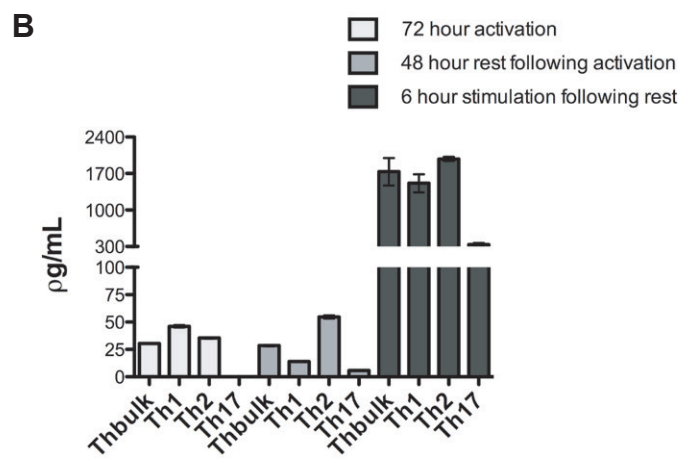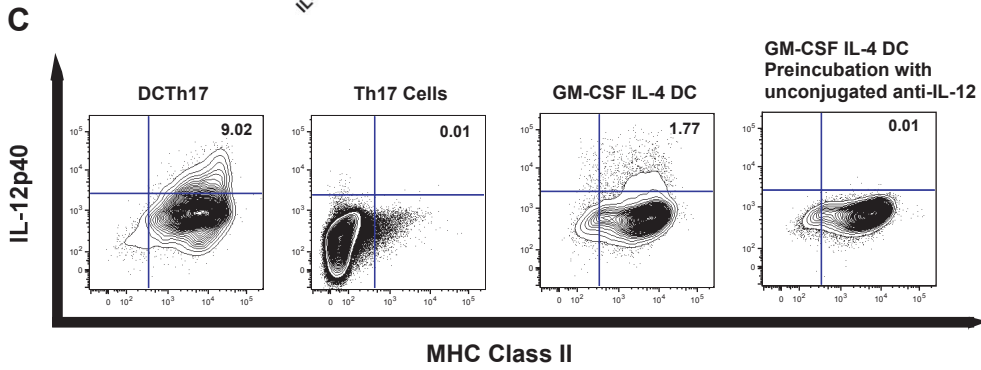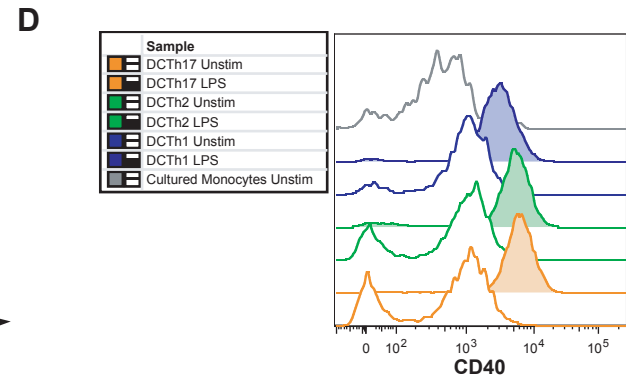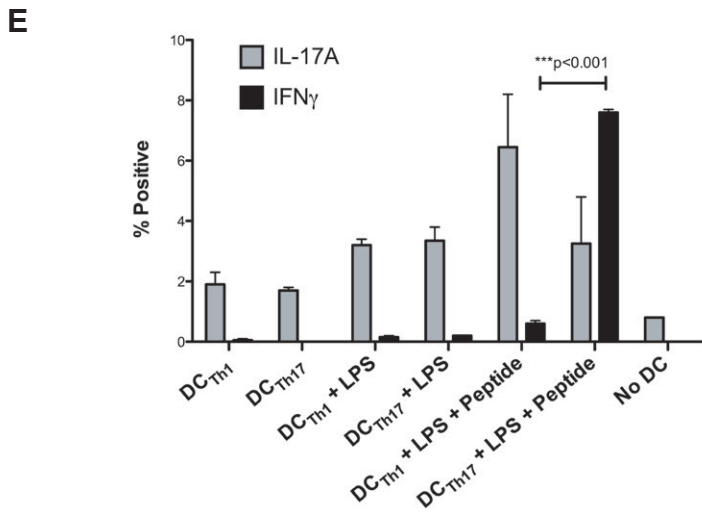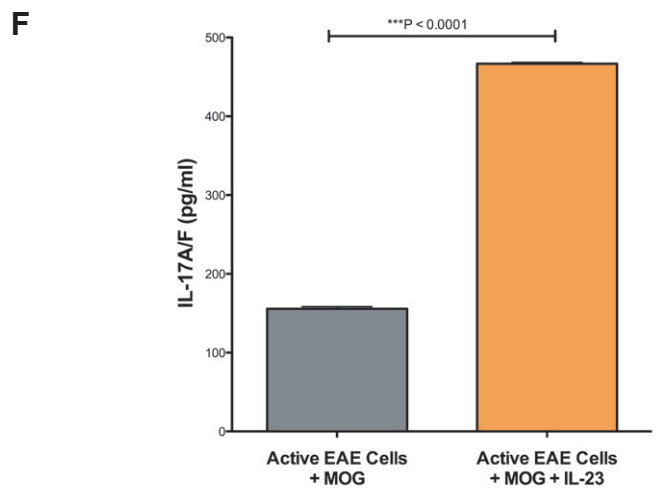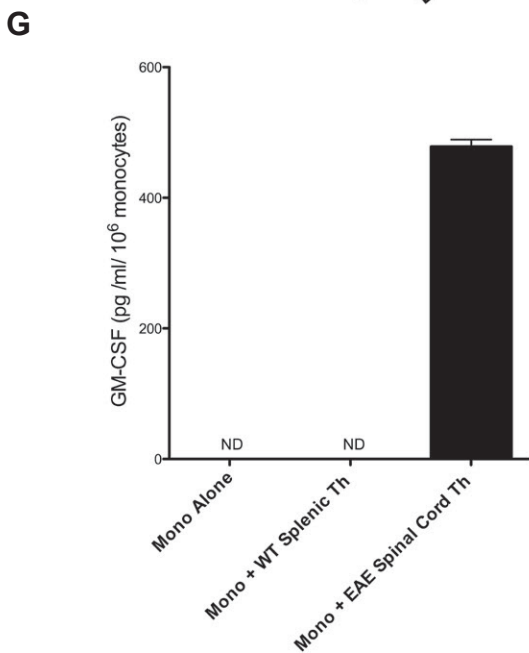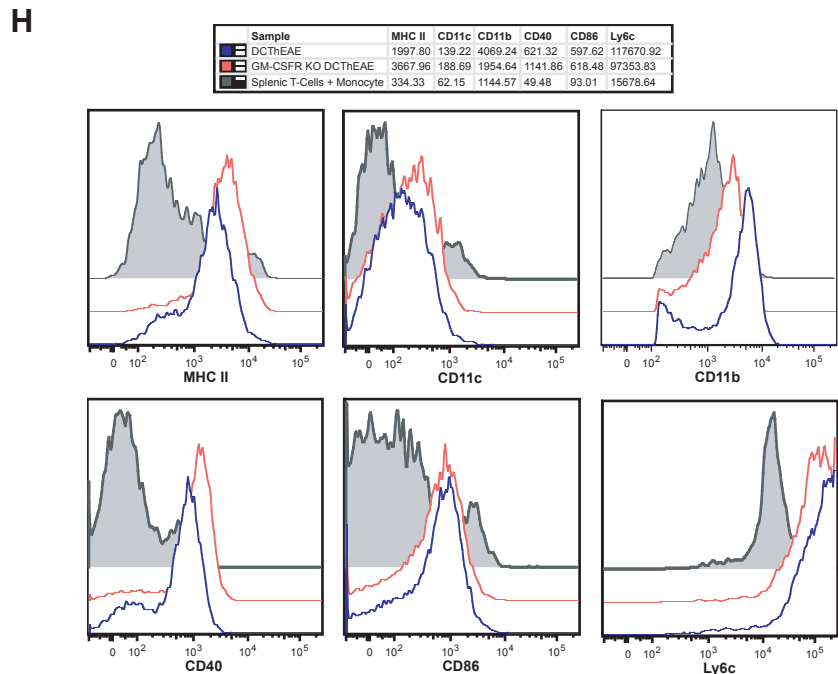

Supplement: NIHMS487733-supplement-5.pdf [file NIHMS487733-supplement-5.pdf]
